# Supplementary material for: The Burden of Cardiovascular Disease Attributable to Major Modifiable Risk Factors in Indonesia
Source: PubMed Central journal article supplement (PMC5037248; doi:10.2188/jea.je20150178), 2016-10-05
Supplement: je-26-515-s005.pdf [file je-26-515-s005.pdf]

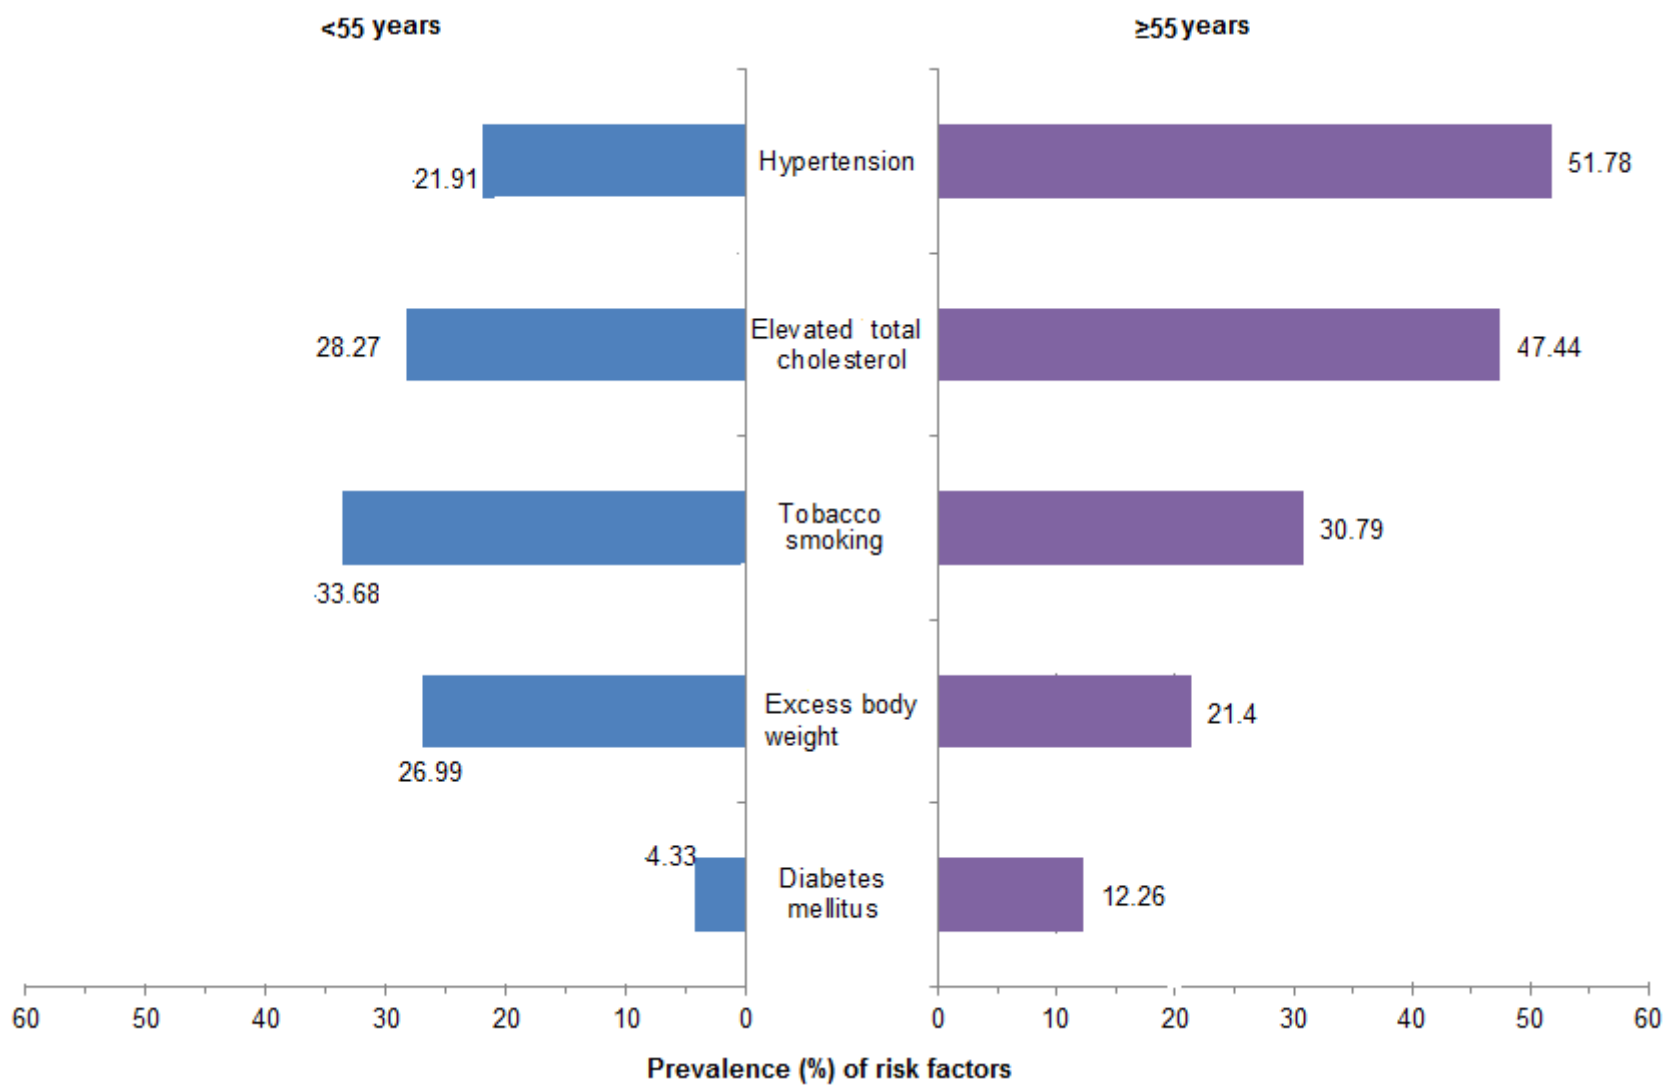

**eFigure 2.** Age-standardized prevalence (%) of selected cardiovascular risk factors in the Riskesdas survey
